# Supplementary material for: Rational design of 1-D metal–organic frameworks based on the novel pyrimidine-4,6-dicarboxylate ligand. New insights into pyrimidine through magnetic interaction
Source: Royal Society of Chemistry journal article supplement (doi:10.1039/b617348a), 2007-01-01
Supplement: b617348a.pdf [file b617348a.pdf]

**SUPPLEMENTARY INFORMATION**

Rational design of 1D metal organic frameworks based on the novel pyrimidine-4,6-dicarboxylate ligand. New insights into the pyrimidine through magnetic interaction.

Garikoitz Beobide, Oscar Castillo,\* Antonio Luque, Urko García-Couceiro, Juan P.

García-Terán, Pascual Román

Departamento de Química Inorgánica. Universidad del País Vasco/Euskal Herriko

Unibertsitatea. Apartado 644. E-48080 Bilbao. Spain.

\* Author to whom correspondence should be addressed. E-mail: [oscar.castillo@ehu.es](mailto:oscar.castillo@ehu.es)

S1. Experimental and simulated XRPD patterns of compounds **6** and **5**, respectively.

S2-S3. Selected bond lengths and angles within the *pmdc* ligand for **1–9**.

S4-S6. Hydrogen-bonding contacts in compounds **1, 2, 4, 5, 7–9**.

S7-S9. Crystal packing of compounds **1–9**.

S10. Thermogravimetric curves (TG/DTA) of compound **8**.

S11.  $\chi_M T$  vs. T plots for compounds **4–6** and **8–12**.

S12. Calculated coupling constants as function of M–N<sub>pym</sub> distance for [(VO)<sub>2</sub>(μ-pym)(H<sub>2</sub>O)<sub>6</sub>]<sup>4+</sup> and [Cr<sub>2</sub>(μ-pym)(H<sub>2</sub>O)<sub>10</sub>]<sup>6+</sup> dimer models.

S13. Calculated coupling constants as function of the metal displacement from the mean plane of the pyrimidine ring for [Cu<sub>2</sub>(μ-pym)(H<sub>2</sub>O)<sub>6</sub>]<sup>4+</sup> and [M<sub>2</sub>(μ-pym)(H<sub>2</sub>O)<sub>10</sub>]<sup>4+</sup> [M(II) = Mn, Fe, Co, Ni] dimer models.

S14. Calculated coupling constants as function of the metal displacement from the mean plane of the pyrimidine ring at different M–N<sub>pym</sub> distances for [Ni<sub>2</sub>(μ-pym)(H<sub>2</sub>O)<sub>10</sub>]<sup>4+</sup> and [Cr<sub>2</sub>(μ-pym)(H<sub>2</sub>O)<sub>10</sub>]<sup>6+</sup> dimer models.

S15. Calculated coupling constants for [Ni<sub>2</sub>(μ-pym)(NH<sub>3</sub>)<sub>10</sub>]<sup>4+</sup>, [Cu<sub>2</sub>(μ-5mpym)(H<sub>2</sub>O)<sub>6</sub>]<sup>4+</sup>, and [Cu<sub>2</sub>(μ-5pymcH)(H<sub>2</sub>O)<sub>6</sub>]<sup>4+</sup> dimer models (*5mpym*: 5-methylpyrimidine; *5pymcH*: 5-pyrimidinecarboxylic acid).

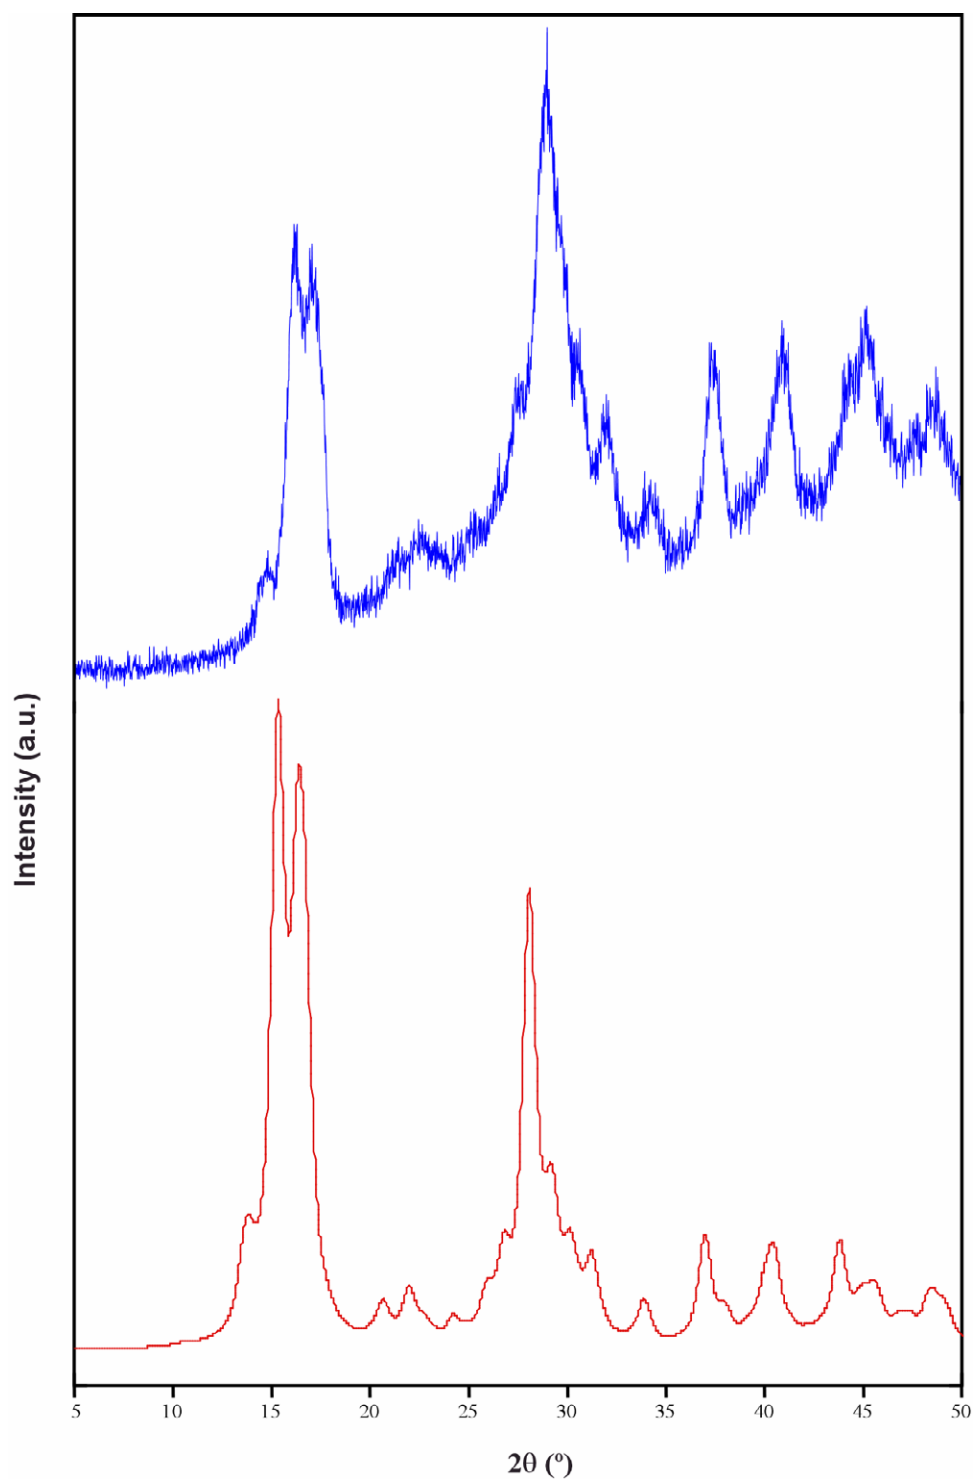

**Figure S1.** Experimental XRPD pattern of compound **6** (up) and the simulated one for compound **5** (down) with a FWHM of 0.5.

**Table S1.** Selected bond lengths (Å) and angles (deg) within the *pmdc* entity for 1–3.<sup>a</sup>

|               | <b>1</b> | <b>2</b>  |               | <b>3</b> |
|---------------|----------|-----------|---------------|----------|
| N1-C2         | 1.330(2) | 1.362(11) | N2-C1         | 1.333(2) |
| N1-C6         | 1.330(2) | 1.369(10) | N2-C3         | 1.340(3) |
| C2-N3         | 1.332(2) | 1.295(11) | C3-C4         | 1.381(2) |
| N3-C4         | 1.329(2) | 1.307(11) | C3-C5         | 1.531(3) |
| C4-C5         | 1.379(2) | 1.417(10) | O51-C5        | 1.247(2) |
| C4-C7         | 1.508(2) | 1.556(9)  | O52-C5        | 1.236(2) |
| C5-C6         | 1.381(2) | 1.347(10) | C1-N2-C3      | 115.9(2) |
| C6-C8         | 1.505(2) | 1.461(10) | N2-C3-C4      | 121.0(2) |
| C7-O71        | 1.293(2) | 1.286(8)  | N2-C3-C5      | 117.5(2) |
| C7-O72        | 1.201(2) | 1.191(9)  | C4-C3-C5      | 121.4(2) |
| C8-O81        | 1.297(2) | 1.267(8)  | C3-C4-C3a     | 118.6(2) |
| C8-O82        | 1.197(2) | 1.257(9)  | O52-C5-O51    | 127.8(2) |
| C6-N1-C2      | 116.3(1) | 115.1(6)  | O52-C5-C3     | 115.7(2) |
| N1-C2-N3      | 126.4(1) | 127.6(4)  | O51-C5-C3     | 116.5(2) |
| C4-N3-C2      | 116.0(1) | 116.6(6)  | N2-C1-N2a     | 127.5(3) |
| N3-C4-C5      | 122.5(1) | 121.9(6)  | $\delta_{C5}$ | 11.55(1) |
| N3-C4-C7      | 118.0(1) | 117.9(6)  |               |          |
| C5-C4-C7      | 119.5(1) | 120.1(6)  |               |          |
| C4-C5-C6      | 116.6(1) | 117.9(4)  |               |          |
| N1-C6-C5      | 122.1(1) | 120.7(7)  |               |          |
| N1-C6-C8      | 118.5(1) | 116.5(6)  |               |          |
| C5-C6-C8      | 119.4(1) | 122.7(6)  |               |          |
| O72-C7-O71    | 125.9(1) | 129.2(6)  |               |          |
| O72-C7-C4     | 120.8(1) | 120.3(6)  |               |          |
| O71-C7-C4     | 113.2(1) | 110.5(6)  |               |          |
| O82-C8-O81    | 125.5(1) | 123.3(6)  |               |          |
| O82-C8-C6     | 121.2(1) | 120.4(6)  |               |          |
| O81-C8-C6     | 113.3(1) | 116.4(6)  |               |          |
| $\delta_{C7}$ | 11.09(1) | 6.57(1)   |               |          |
| $\delta_{C8}$ | 2.14(1)  | 5.82(1)   |               |          |

<sup>a</sup> Symmetry code: (a)  $x, -y - 1/2, z$ . <sup>b</sup>  $\delta$ : dihedral angles between pyrimidine ring and carboxylate groups.

**Table S2.** Selected bond lengths (Å) and angles (deg) within the *pmdc* ligand for 4–9.<sup>a</sup>

|            | 4          | 5        | 7        | 9        |            | 8        |
|------------|------------|----------|----------|----------|------------|----------|
| N1-C2      | 1.326(2)   | 1.322(3) | 1.326(3) | 1.325(3) | N1-C2      | 1.341(4) |
| N1-C6      | 1.339(2)   | 1.340(3) | 1.338(4) | 1.338(3) | N1-C4      | 1.325(3) |
| C2-N3      | 1.326(2)   | 1.321(3) | 1.323(3) | 1.338(3) | C2-C3      | 1.374(4) |
| N3-C4      | 1.337(2)   | 1.342(3) | 1.339(4) | 1.333(3) | C2-C5      | 1.526(4) |
| C4-C5      | 1.385(2)   | 1.379(4) | 1.387(4) | 1.372(3) | C3-C2a     | 1.374(4) |
| C4-C8      | 1.531(2)   | 1.525(4) | 1.527(4) | 1.529(3) | C4-N1a     | 1.325(3) |
| C5-C6      | 1.389(2)   | 1.388(4) | 1.382(4) | 1.380(3) | C5-O52     | 1.225(4) |
| C6-C7      | 1.525(2)   | 1.529(4) | 1.532(4) | 1.512(3) | C5-O51     | 1.263(4) |
| C7-O72     | 1.231(2)   | 1.228(3) | 1.223(3) | 1.222(3) | C4-N1-C2   | 118.8(3) |
| C7-O71     | 1.2637(2)  | 1.265(3) | 1.269(3) | 1.278(3) | N1-C2-C3   | 121.1(3) |
| C8-O82     | 1.241(2)   | 1.236(3) | 1.238(3) | 1.230(3) | N1-C2-C5   | 114.7(3) |
| C8-O81     | 1.258(4)   | 1.259(3) | 1.268(3) | 1.254(3) | C3-C2-C5   | 124.2(3) |
| C2-N1-C6   | 118.1(1)   | 118.1(2) | 118.2(2) | 117.1(2) | C2-C3-C2a  | 117.1(4) |
| N3-C2-N1   | 124.5(1)   | 124.5(3) | 124.4(3) | 125.9(2) | N1-C4-N1a  | 123.1(4) |
| C2-N3-C4   | 118.0(1)   | 118.0(2) | 118.3(2) | 116.3(2) | O52-C5-O51 | 127.1(3) |
| N3-C4-C5   | 121.6(1)   | 121.5(2) | 120.8(2) | 122.0(2) | O52-C5-C2  | 118.4(3) |
| N3-C4-C8   | 114.7(1)   | 114.1(2) | 115.2(2) | 115.7(2) | O51-C5-C2  | 114.4(3) |
| C5-C4-C8   | 123.8(1)   | 124.4(3) | 123.9(3) | 122.3(2) |            |          |
| C4-C5-C6   | 116.7(1)   | 116.6(2) | 117.2(3) | 117.7(2) |            |          |
| N1-C6-C5   | 121.2(1)   | 121.2(2) | 121.0(3) | 121.0(2) |            |          |
| N1-C6-C7   | 115.4(1)   | 115.0(2) | 115.7(2) | 116.5(2) |            |          |
| C5-C6-C7   | 123.5(1)   | 123.9(3) | 123.3(3) | 122.5(2) |            |          |
| O72-C7-O71 | 126.0(1)   | 126.0(3) | 126.3(3) | 125.9(2) |            |          |
| O72-C7-C6  | 118.2(1)   | 118.6(3) | 117.9(3) | 118.0(2) |            |          |
| O71-C7-C6  | 115.8(1)   | 115.4(2) | 115.8(3) | 116.1(2) |            |          |
| O82-C8-O81 | 126.5(1)   | 126.2(3) | 126.2(3) | 126.4(2) |            |          |
| O82-C8-C4  | 117.32(12) | 118.0(3) | 117.6(3) | 116.8(2) |            |          |
| O81-C8-C4  | 116.13(12) | 115.8(2) | 116.2(2) | 116.8(2) |            |          |

<sup>a</sup> Symmetry: (a) – x + 2, y, – z + 1/2.

**Table S3.** Hydrogen-bonding contacts ( $\text{\AA}$ ,  $^\circ$ ) in compounds **1** and **2**.<sup>a</sup>

| <i>D-H...A</i> <sup>b</sup> | <i>D-H</i> | <i>H...A</i> | <i>D...A</i> | <i>D-H...A</i> |
|-----------------------------|------------|--------------|--------------|----------------|
| <b>Compound 1</b>           |            |              |              |                |
| O81-H81...O1wa              | 0.87       | 1.64         | 2.509(2)     | 171.7          |
| O71-H71...O2wb              | 0.86       | 1.68         | 2.505(2)     | 159.6          |
| O1w-H11...N1c               | 0.87       | 2.10         | 2.960(2)     | 171.7          |
| O1w-H12...O82d              | 0.86       | 1.90         | 2.763(2)     | 176.5          |
| O2w-H21...N3e               | 0.99       | 1.90         | 2.886(2)     | 171.9          |
| O2w-H22...O72f              | 0.83       | 1.99         | 2.802(2)     | 163.8          |
| <b>Compound 2</b>           |            |              |              |                |
| O71-H71...O81               | 0.73       | 1.71         | 2.426(8)     | 171(4)         |

<sup>a</sup> Symmetry: (a)  $x + 1, y + 1, z$ . (b)  $-x, -y + 1, -z$ . (c)  $-x + 1, -y + 1, -z + 1$ . (d)  $-x + 1, -y + 2, -z + 1$ . (e)  $x + 1, y, z$ . (f)  $x + 1, y - 1, z$ .

<sup>b</sup> D = donor; A = acceptor.

**Table S4.** Hydrogen-bonding contacts (Å, °) in compounds **4**, **5**, **7**, and **8**.<sup>a</sup>

| <i>D-H...A</i> <sup>b</sup> | <i>D-H</i> | <i>H...A</i> | <i>D...A</i> | <i>D-H...A</i> |
|-----------------------------|------------|--------------|--------------|----------------|
| <b>Compound 4</b>           |            |              |              |                |
| O1w-H11...O3w               | 0.76       | 2.02         | 2.768(2)     | 169.2          |
| O1w-H12...O82a              | 0.70       | 2.11         | 2.762(2)     | 156.5          |
| O2w-H21...O72b              | 0.74       | 1.96         | 2.686(2)     | 166.0          |
| O2w-H22...O82c              | 0.74       | 2.04         | 2.754(2)     | 161.8          |
| O3w-H31...O81d              | 0.77       | 2.35         | 3.096(2)     | 165.8          |
| O3w-H32...O71e              | 0.89       | 2.06         | 2.936(2)     | 167.2          |
| <b>Compound 5</b>           |            |              |              |                |
| O1w-H11...O3w               | 0.82       | 2.01         | 2.800(3)     | 161.2          |
| O1w-H12...O82a              | 0.84       | 1.93         | 2.763(3)     | 171.8          |
| O2w-H21...O72b              | 0.84       | 1.86         | 2.695(3)     | 170.1          |
| O2w-H22...O82c              | 0.86       | 2.00         | 2.823(3)     | 159.1          |
| O3w-H31...O81d              | 0.84       | 2.19         | 3.026(3)     | 168.3          |
| O3w-H32...O71e              | 0.85       | 2.17         | 2.936(3)     | 149.8          |
| <b>Compound 7</b>           |            |              |              |                |
| O1w-H11...O3w               | 0.82       | 2.00         | 2.782(3)     | 160.3          |
| O1w-H12...O82a              | 0.72       | 2.07         | 2.780(3)     | 172.4          |
| O2w-H21...O72b              | 0.85       | 1.87         | 2.711(3)     | 170.5          |
| O2w-H22...O82c              | 0.68       | 2.12         | 2.783(3)     | 163.5          |
| O3w-H31...O81d              | 0.64       | 2.43         | 3.065(3)     | 170.4          |
| O3w-H32...O71e              | 0.69       | 2.26         | 2.947(3)     | 171.3          |
| <b>Compound 8</b>           |            |              |              |                |
| O1w-H11...O52f              | 0.82       | 2.00         | 2.782(3)     | 160.3          |
| O1w-H12...O52g              | 0.72       | 2.07         | 2.780(3)     | 172.4          |

<sup>a</sup> Symmetry: (a)  $-x + 1, y + 1/2, -z + 3/2$ . (b)  $-x, -y - 1, -z + 1$ . (c)  $-x, y + 1/2, -z + 3/2$ .

(d)  $-x + 1, -y - 1, -z + 2$ . (e)  $-x + 1, -y - 1, -z + 1$  (f)  $x - 1/2, y + 1/2, z$ . (g)  $-x + 3/2, -y - 1/2, -z + 1$ .

<sup>b</sup> D = donor; A = acceptor.

**Table S5.** Hydrogen-bonding contacts (Å, °) in compound **9**.<sup>a</sup>

| <i>D-H...A</i> <sup>b</sup> | <i>D-H</i> | <i>H...A</i> | <i>D...A</i> | <i>D-H...A</i> |
|-----------------------------|------------|--------------|--------------|----------------|
| N17-H17...O4wa              | 0.86       | 2.01         | 2.852(2)     | 165.5          |
| O1w-H12...O82a              | 0.86       | 1.94         | 2.763(3)     | 159.8          |
| O2w-H21...O1w               | 0.93       | 1.96         | 2.878(3)     | 172.9          |
| O2w-H22...O72b              | 0.86       | 1.97         | 2.803(3)     | 162.3          |
| O3w-H31...O2wc              | 0.82       | 2.06         | 2.834(3)     | 156.6          |
| O3w-H32...O71d              | 1.00       | 1.91         | 2.888(3)     | 165.2          |
| O4w-H41...O3w               | 0.89       | 1.88         | 2.753(3)     | 168.5          |
| O4w-H42...O81e              | 0.85       | 2.08         | 2.919(2)     | 171.0          |

<sup>a</sup> Symmetry: (a)  $x + 1, y, z$ . (b)  $-x - 1, -y, -z$ . (c)  $-x - 1, y - 1/2, -z + 1/2$ . (d)  $x, -y - 1/2, z + 1/2$ . (e)  $x, -y - 1/2, z - 1/2$ .

<sup>b</sup> D = donor; A = acceptor.

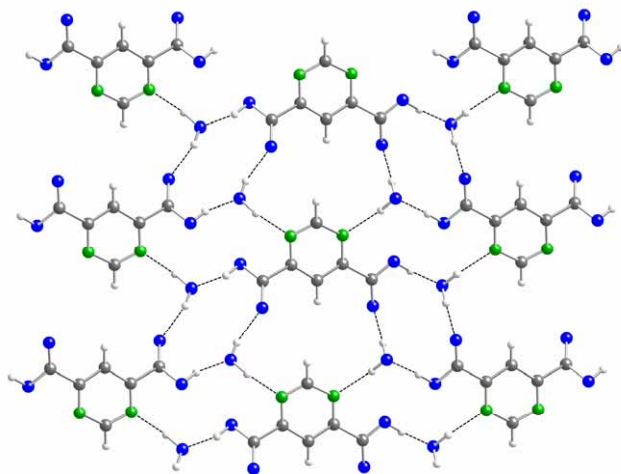

**Figure S2.** A view of the crystal packing of compound **1** along [10-1] crystallographic direction, showing the hydrogen-bonding network.

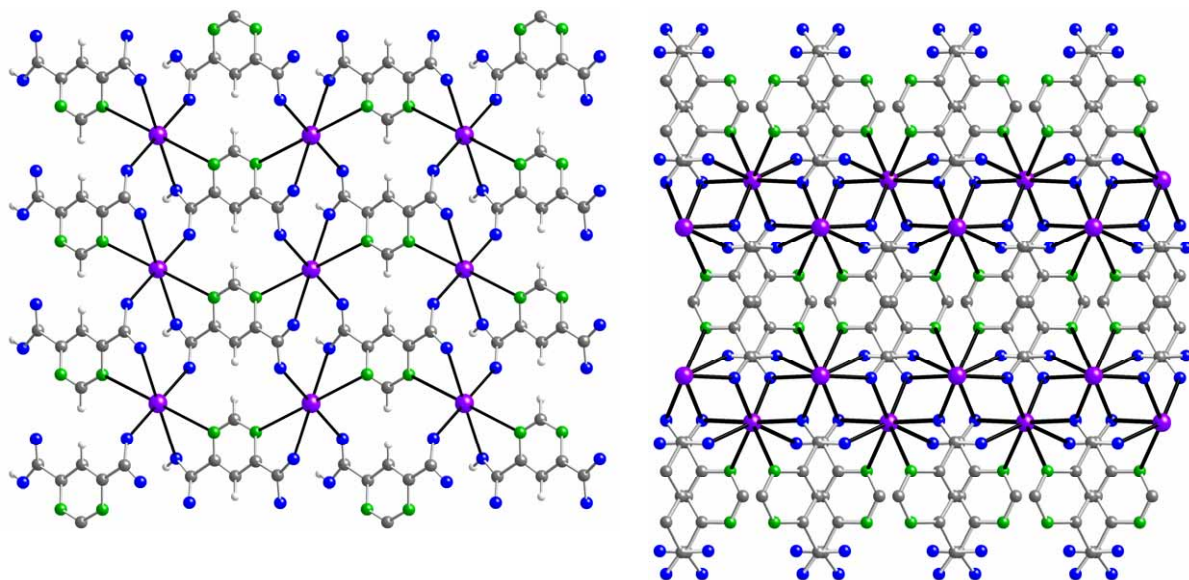

**Figure S3.** Crystal structure of compound **2** and **3** viewed along the [100] crystallographic direction.



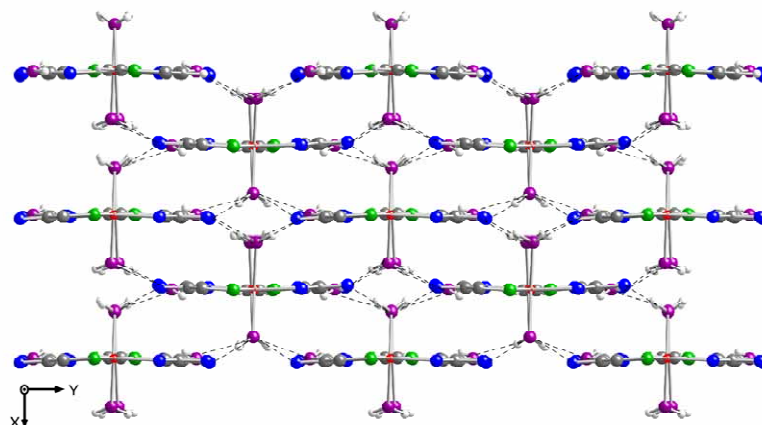

**Figure S4.** Crystal structure of compounds **4–8** viewed along the  $[001]$  direction showing the hydrogen bonding interactions (dashed lines).

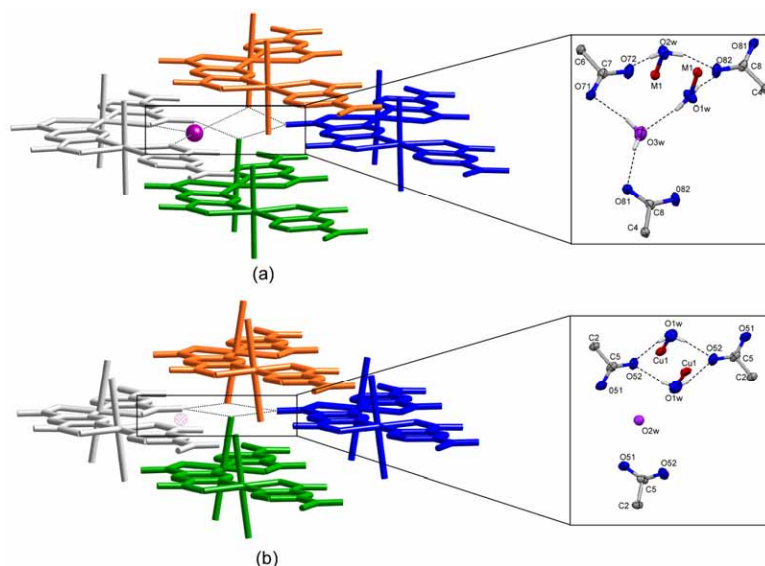

**Figure S5.** Hydrogen bonding interaction scheme among four polymeric chains and one crystallization water molecule in compounds (a) **4–7** and (b) in compound **8**. Dotted lines represent hydrogen-bonding interactions.

The polymeric chains of compounds **4**, **5** and **7** run along the  $[001]$  crystallographic direction (Figure S4) and each chain interacts with four surrounding ones by means of three direct hydrogen bonds (see Supporting Information) established between the coordinated water molecules and noncoordinated O atoms of the carboxylate groups. Each solvation water molecule (Figure S5a) is hydrogen bonded to the coordinated carboxylate-O atoms of two symmetry related *pmdc* ligands belonging to the same chain and binds another chain by means of the hydrogen interaction established with one of the coordinated water molecules. In the case of compound **8**, the coordinated water molecules is solely hydrogen-bonded to the noncoordinated O atoms of the carboxylate group (Figure S5b) due to the partial release of crystallization water molecule, but although this compound crystallizes in a different space group there is not other remarkable difference in the crystal packing.

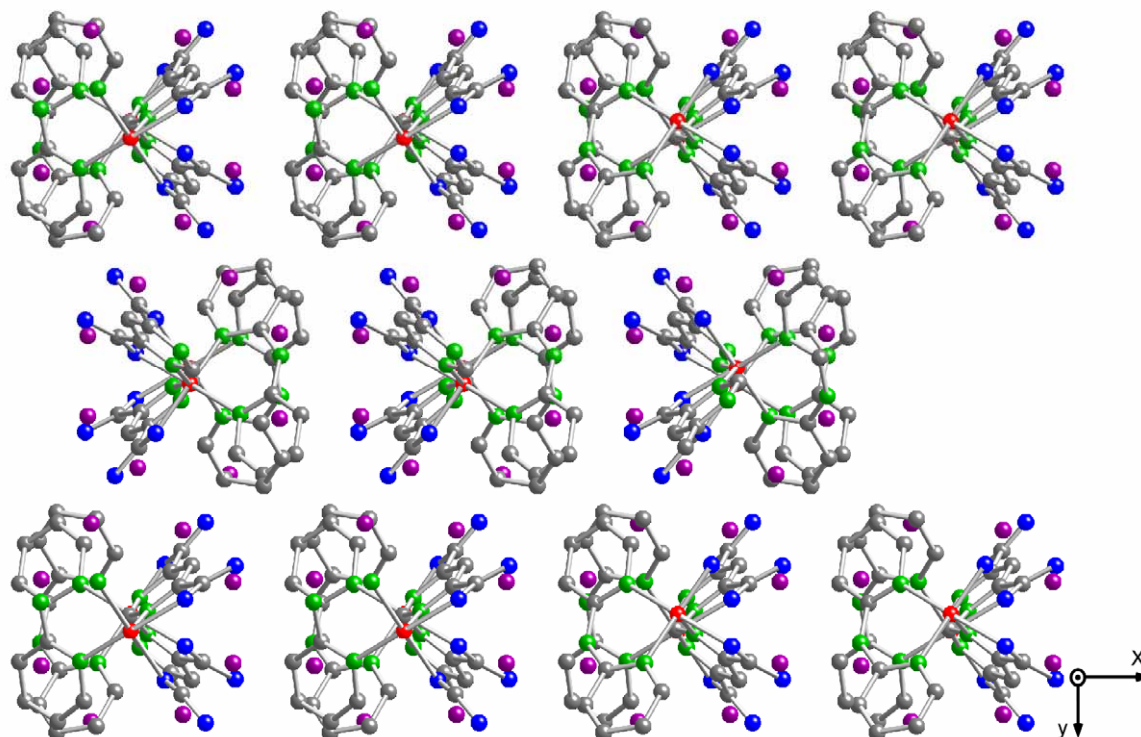

**Figure S6.** View of the crystal packing of compound **9** along the [001] crystallographic direction. Hydrogen atoms have been omitted for clarity.

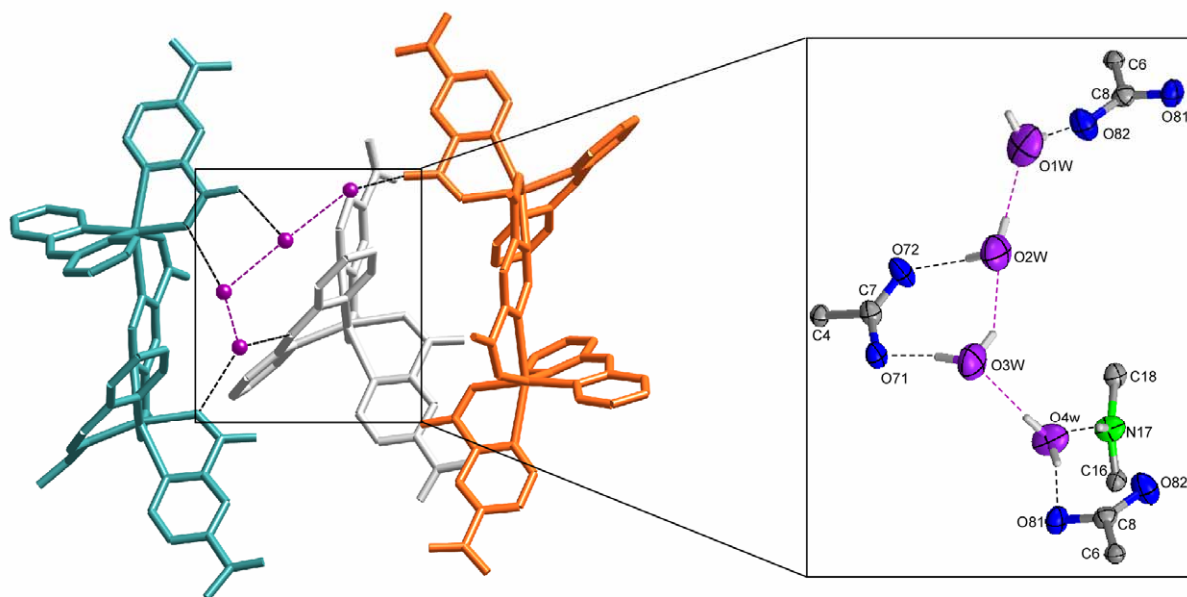

**Figure S7.** Perspective view of three polymeric chains hosting the water cluster. The enhanced area shows the immediate environment of the water cluster. Dotted lines represent hydrogen-bonding interactions.

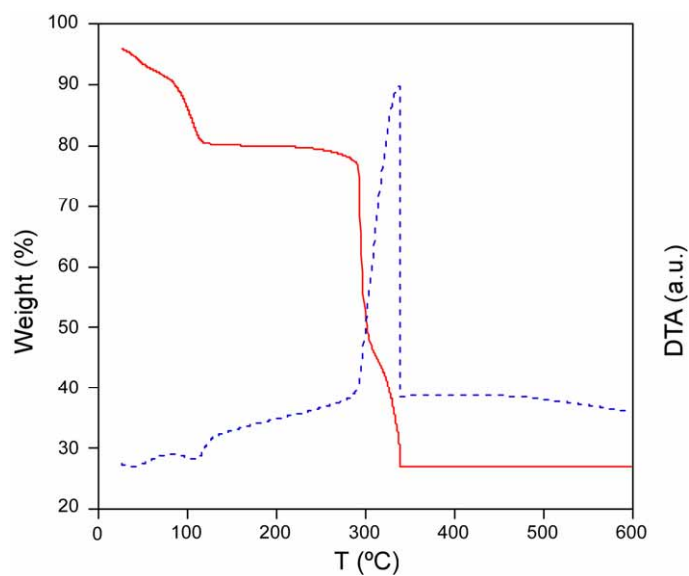

**Figure S8.** Thermogravimetric curves (TG/DTA) of compound **8**.

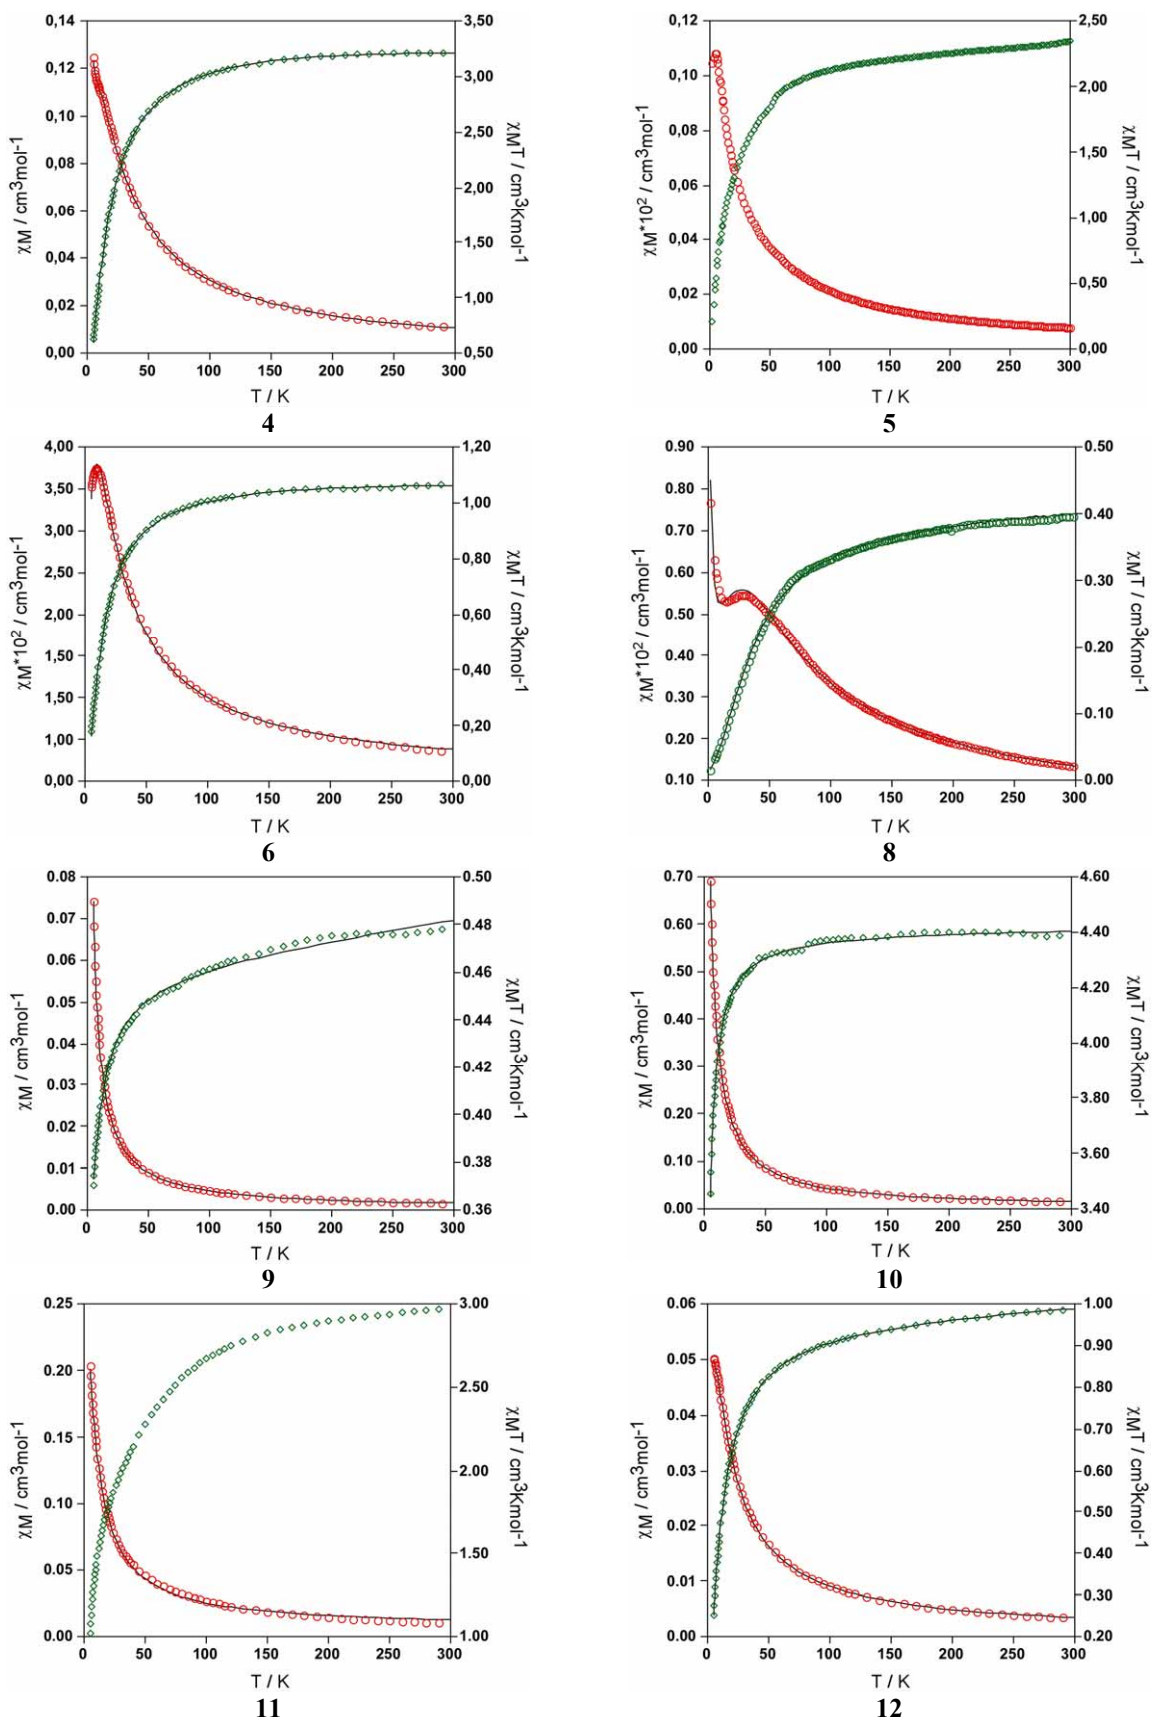

Figure S9.  $\chi_M T$  vs  $T$  plots for compounds 4–6 and 8–12; (–) best theoretical fit.

1. Calculated coupling constants as function of V–N<sub>pym</sub> distance for [(VO)<sub>2</sub>(μ-pym)(H<sub>2</sub>O)<sub>6</sub>]<sup>4+</sup> dimer model. Calculations have been performed in an idealised C<sub>2v</sub> symmetry using the following structural parameters:

- Bond lengths (Å): V–N<sub>pym</sub> 1.90–2.40, V=O 1.58, V–O<sub>w</sub> 2.00, C1–N2 1.36, N2–C3 1.35, C3–C4 1.41, C–H 1.00, O<sub>w</sub>–H 1.00.
- Coordination geometry around the metal atom: square pyramid.
- O=V–N–C torsion angle: 0.0°.

Structural parameters concerning the pyrimidine bridge and water have been kept unchanged in all analyzed models.

$$\langle S^2 \rangle_{\text{HS}} = 2.0583 - 2.0675; \langle S^2 \rangle_{\text{BS}} = 1.0537 - 1.0674.$$

**Table S6.** Calculated  $J$  values (cm<sup>-1</sup>) as function of V–N<sub>pym</sub> distance (Å).

| V–N <sub>pym</sub> | $J_{\text{calc}}$ |
|--------------------|-------------------|
| 1.90               | +39.1             |
| 2.00               | +12.7             |
| 2.10               | +2.1              |
| 2.20               | -2.1              |
| 2.30               | -4.1              |
| 2.40               | -6.3              |

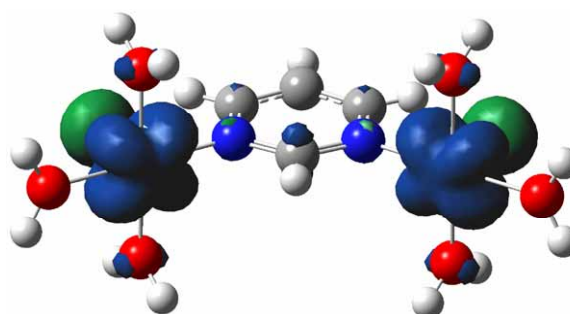

**Figure S10.** Calculated spin-density distribution of the triplet ( $S = 1$ ) state at V–N<sub>pym</sub> 2.00 Å.

2. Calculated coupling constants as function of Cr–N<sub>pym</sub> distance for [Cr<sub>2</sub>(μ-pym)(H<sub>2</sub>O)<sub>10</sub>]<sup>6+</sup> dimer model. Calculations have been performed in an idealised C<sub>2v</sub> symmetry using the following structural parameters:

- Bond lengths (Å): Cr–N<sub>pym</sub> 1.90–2.40, Cr–O<sub>w</sub> 2.00.
- Coordination geometry around the metal atom: octahedral.
- O<sub>w</sub>–Cr–N–C torsion angles: 90.0 and 0.0°.

$$\langle S^2 \rangle_{\text{HS}} = 12.0318 - 12.0413; \langle S^2 \rangle_{\text{BS}} = 3.0283 - 3.0413.$$

**Table S7.** Calculated  $n^2 \cdot J$  values as function of Cr–N<sub>pym</sub> distance.

| Cr–N <sub>pym</sub> (Å) | $n^2 \cdot J_{\text{calc}}$ (cm <sup>-1</sup> ) |
|-------------------------|-------------------------------------------------|
| 1.90                    | +37.0                                           |
| 2.00                    | +16.8                                           |
| 2.10                    | +6.9                                            |
| 2.20                    | +1.7                                            |
| 2.30                    | -1.2                                            |
| 2.40                    | -2.9                                            |

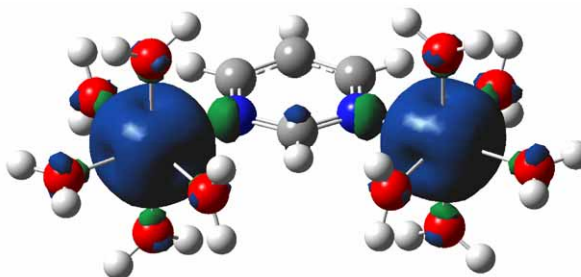

**Figure S11.** Calculated spin-density distribution of the heptuplet ( $S = 3$ ) state at Cr–N<sub>pym</sub> 2.00 Å.

3. Calculated coupling constants as function of the metal displacement from the mean plane of the pyrimidine ring for  $[\text{Cu}_2(\mu\text{-pym})(\text{H}_2\text{O})_6]^{4+}$  and  $[\text{M}_2(\mu\text{-pym})(\text{H}_2\text{O})_{10}]^{4+}$  [ $\text{M}(\text{II}) = \text{Mn}, \text{Fe}, \text{Co}, \text{Ni}$ ] dimer models. Calculations have been performed in an idealised  $C_2$  symmetry using the following structural parameters:

- Bond lengths (Å): Cu–N<sub>pym</sub> 2.00, Cu–O<sub>w</sub> 2.00; Ni–N<sub>pym</sub> 2.00, Ni–O<sub>w</sub> 2.00; Co–N<sub>pym</sub> 2.20, Co–O<sub>w</sub> 2.20; Fe–N<sub>pym</sub> 2.20, Fe–O<sub>w</sub> 2.20; Mn–N<sub>pym</sub> 2.20, Mn–O<sub>w</sub> 2.20.
- Coordination geometry around the metal atom: square planar for Cu and octahedral for Mn, Fe, Co, and Ni.
- Ow–M–N–C torsion angles: 90.0 and 0.0°.

Cu(II) models:  $\langle S^2 \rangle_{\text{HS}} = 2.0038 - 2.0040$ ;  $\langle S^2 \rangle_{\text{BS}} = 1.0011 - 1.0021$ .

Ni(II) models:  $\langle S^2 \rangle_{\text{HS}} = 6.0050 - 6.0051$ ;  $\langle S^2 \rangle_{\text{BS}} = 2.0038 - 2.0039$ .

Mn(II) models:  $\langle S^2 \rangle_{\text{HS}} = 30.0040 - 30.0043$ ;  $\langle S^2 \rangle_{\text{BS}} = 5.0035 - 5.0038$ .

Fe(II) models:  $\langle S^2 \rangle_{\text{HS}} = 20.0176 - 20.0179$ ;  $\langle S^2 \rangle_{\text{BS}} = 4.0159 - 4.0161$ .

Co(II) models:  $\langle S^2 \rangle_{\text{HS}} = 12.0037 - 12.0038$ ;  $\langle S^2 \rangle_{\text{BS}} = 3.0033 - 3.0034$ .

**Table S8.** Calculated  $J$  and  $n^2 \cdot J$  values ( $\text{cm}^{-1}$ ) as function of metal for Cu and Ni dimer models.

| $d_{\text{M}}$ (Å) | Cu                |                             | Ni                |                             |
|--------------------|-------------------|-----------------------------|-------------------|-----------------------------|
|                    | $J_{\text{calc}}$ | $n^2 \cdot J_{\text{calc}}$ | $J_{\text{calc}}$ | $n^2 \cdot J_{\text{calc}}$ |
| 0                  | -31.5             | -31.5                       | -17.3             | -69.2                       |
| 0.174              | -29.4             | -29.4                       | -7.8              | -31.2                       |
| 0.347              | -26.5             | -26.5                       | +1.2              | +4.8                        |
| 0.517              | -23.7             | -23.7                       |                   |                             |
| 0.684              | -20.7             | -20.7                       |                   |                             |

**Table S9.** Calculated  $J$  and  $n^2 \cdot J$  values ( $\text{cm}^{-1}$ ) as function of metal displacement for Mn, Fe and Co dimer models.

| $d_{\text{M}}$ (Å) | Mn                |                             | Fe                |                             | Co                |                             |
|--------------------|-------------------|-----------------------------|-------------------|-----------------------------|-------------------|-----------------------------|
|                    | $J_{\text{calc}}$ | $n^2 \cdot J_{\text{calc}}$ | $J_{\text{calc}}$ | $n^2 \cdot J_{\text{calc}}$ | $J_{\text{calc}}$ | $n^2 \cdot J_{\text{calc}}$ |
| 0                  | -3.0              | -75.0                       | -4.6              | -73.6                       | -9.8              | -88.2                       |
| 0.191              | -1.6              | -40.0                       | -1.2              | -19.2                       | -4.3              | -38.7                       |
| 0.382              | +0.4              | +10.0                       | 1.7               | +27.2                       | +1.3              | +11.7                       |

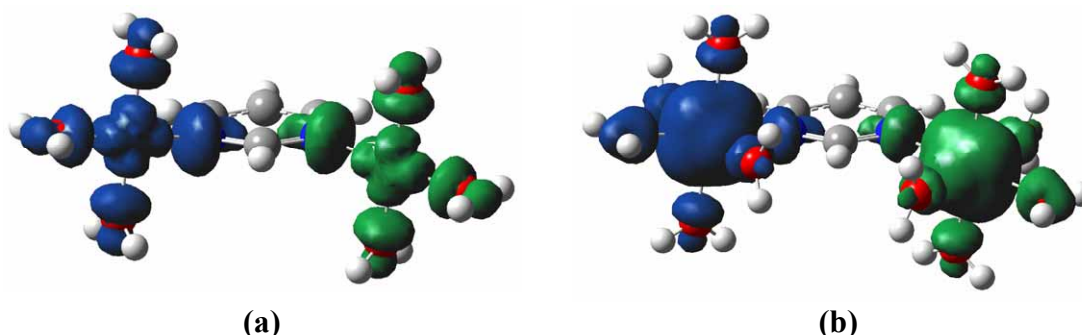

**Figure S12.** Calculated spin-density distribution of the singlet state ( $S = 0$ ) state of (a)  $[\text{Cu}_2(\mu\text{-pym})(\text{H}_2\text{O})_6]^{4+}$  and (b)  $[\text{Co}_2(\mu\text{-pym})(\text{H}_2\text{O})_{10}]^{4+}$  with a surface threshold level of 0.0015. The corresponding metal displacements from the mean plane of the pyrimidine ring are 0.347 and 0.382 Å for Cu(II) and Co(II) models, respectively.

4. Calculated coupling constants as function of the metal displacement from the mean plane of the pyrimidine ring at different M–N<sub>pym</sub> distances for [Ni<sub>2</sub>(μ-pym)(H<sub>2</sub>O)<sub>10</sub>]<sup>4+</sup> and [Cr<sub>2</sub>(μ-pym)(H<sub>2</sub>O)<sub>10</sub>]<sup>6+</sup> dimer models.

Ni(II) model:  $\langle S^2 \rangle_{\text{HS}} = 6.0029 - 6.0051$ ;  $\langle S^2 \rangle_{\text{BS}} = 2.0026 - 2.0045$ .

Cr(III) model:  $\langle S^2 \rangle_{\text{HS}} = 12.0317 - 12.0383$ ;  $\langle S^2 \rangle_{\text{BS}} = 3.0284 - 3.0382$ .

**Table S10.** Calculated  $J$  values (cm<sup>-1</sup>) as function of metal displacement ( $d_{\text{M}}$ ) for Ni dimer model at different Ni–N<sub>pym</sub> distances.

| 2.00 Å             |                                       | 2.20 Å             |                                       | 2.40 Å             |                                       |
|--------------------|---------------------------------------|--------------------|---------------------------------------|--------------------|---------------------------------------|
| $d_{\text{M}}$ (Å) | $J_{\text{calc}}$ (cm <sup>-1</sup> ) | $d_{\text{M}}$ (Å) | $J_{\text{calc}}$ (cm <sup>-1</sup> ) | $d_{\text{M}}$ (Å) | $J_{\text{calc}}$ (cm <sup>-1</sup> ) |
| 0                  | -17.27                                | 0                  | -14.09                                | 0                  | -11.30                                |
| 0.174              | -7.82                                 | 0.191              | -6.92                                 | 0.209              | -6.44                                 |
| 0.347              | +1.20                                 | 0.382              | +1.32                                 | 0.416              | +2.17                                 |

**Table S11.** Calculated  $J$  values (cm<sup>-1</sup>) as function of metal displacement ( $d_{\text{M}}$ ) for Cr dimer model at different Cr–N<sub>pym</sub> distances.

| 1.90 Å             |                                       | 2.10 Å             |                                       | 2.30 Å             |                                       |
|--------------------|---------------------------------------|--------------------|---------------------------------------|--------------------|---------------------------------------|
| $d_{\text{M}}$ (Å) | $J_{\text{calc}}$ (cm <sup>-1</sup> ) | $d_{\text{M}}$ (Å) | $J_{\text{calc}}$ (cm <sup>-1</sup> ) | $d_{\text{M}}$ (Å) | $J_{\text{calc}}$ (cm <sup>-1</sup> ) |
| 0                  | +4.11                                 | 0                  | +0.76                                 | 0                  | -0.13                                 |
| 0.166              | +4.07                                 | 0.183              | +0.76                                 | 0.200              | -0.12                                 |
| 0.329              | +3.91                                 | 0.365              | +0.77                                 | 0.399              | -0.08                                 |

5. Calculated coupling constants for  $[\text{Ni}_2(\mu\text{-pym})(\text{NH}_3)_{10}]^{4+}$ ,  $[\text{Ni}_2(\mu\text{-pym})(\text{H}_2\text{O})_{10}]^{4+}$ ,  $[\text{Cu}_2(\mu\text{-5mpym})(\text{H}_2\text{O})_6]^{4+}$ , and  $[\text{Cu}_2(\mu\text{-5pymcH})(\text{H}_2\text{O})_6]^{4+}$  dimer models (*5mpym*: 5-methylpyrimidine; *5pymcH*: 5-pyrimidinecarboxylic acid) in the idealised  $C_2$ ,  $C_s$ , and  $C_1$  symmetries, respectively.

- $[\text{Ni}_2(\mu\text{-pym})(\text{NH}_3)_{10}]^{4+}$   $J = -10.2 \text{ cm}^{-1}$
- $[\text{Ni}_2(\mu\text{-pym})(\text{H}_2\text{O})_{10}]^{4+}$   $J = -17.3 \text{ cm}^{-1}$

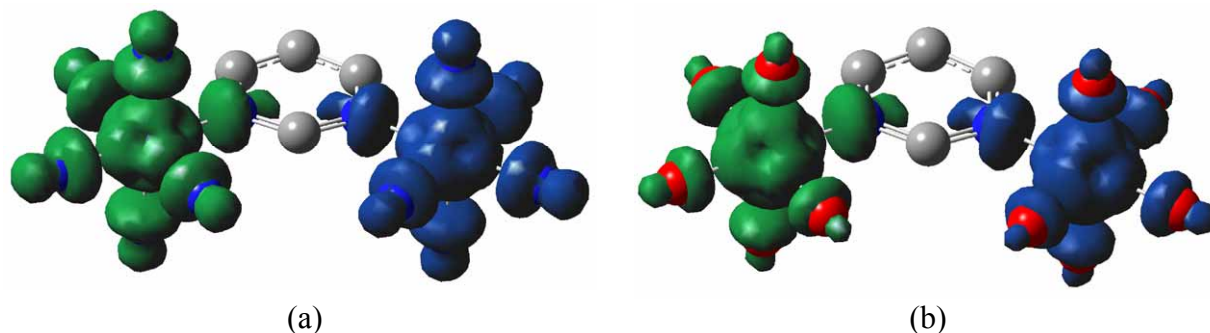

**Figure S13.** Calculated spin-density distribution of the ground state ( $S = 0$ ) of (a)  $[\text{Ni}_2(\mu\text{-pym})(\text{NH}_3)_{10}]^{4+}$  and (b)  $[\text{Ni}_2(\mu\text{-pym})(\text{H}_2\text{O})_{10}]^{4+}$  with a surface threshold level of 0.0015. Hydrogen atoms were omitted for clarity.

- $[\text{Cu}_2(\mu\text{-5mpym})(\text{H}_2\text{O})_6]^{4+}$   $J = -33.5 \text{ cm}^{-1}$

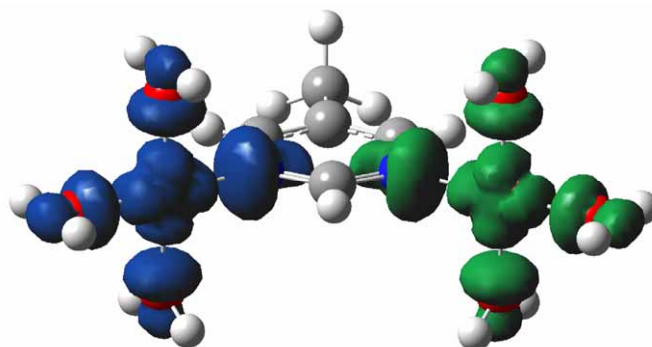

**Figure S14.** Calculated spin-density distribution of the ground state ( $S = 0$ ) of  $[\text{Cu}_2(\mu\text{-5mpym})(\text{H}_2\text{O})_6]^{4+}$  with a surface threshold level of 0.0015.

- $[\text{Cu}_2(\mu\text{-5pymcH})(\text{H}_2\text{O})_6]^{4+}$   $J = -28.5 \text{ cm}^{-1}$

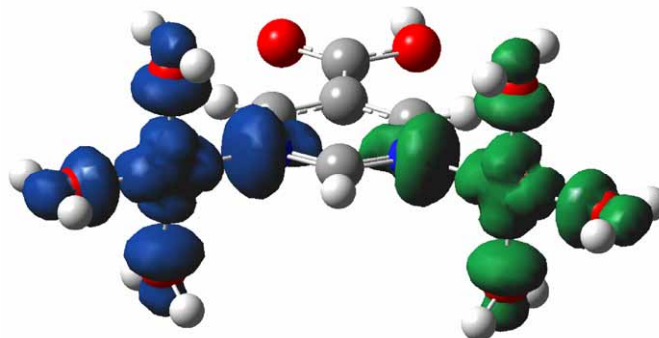

**Figure S15.** Calculated spin-density distribution of the ground state ( $S = 0$ ) of  $[\text{Cu}_2(\mu\text{-5pymcH})(\text{H}_2\text{O})_6]^{4+}$  with a surface threshold level of 0.0015.
